# Supplementary material
Source: publisher figshare collection journal article supplement (https://sage.figshare.com/ndownloader/files/18005048)
Supplement: Supplementary file 1 [file 18005048]

## Appendix: Measurements of scale and indexes

**Table A1** The perceived usefulness of formal strategic planning.

|                                                                                                                | <i>N</i> | <i>Mean</i> | <i>Min</i> | <i>Max</i> |
|----------------------------------------------------------------------------------------------------------------|----------|-------------|------------|------------|
| a) Using the strategic planning process for plan development will improve the performance of my municipality   | 171      | 5.34        | 1          | 7          |
| b) Using the strategic planning process for plan development will improve the productivity of my municipality  | 173      | 5.25        | 2          | 7          |
| c) Using the strategic planning process for plan development will enhance the effectiveness of my municipality | 169      | 5.26        | 3          | 7          |
| d) The strategic planning process is useful for plan development in my municipality                            | 169      | 5.62        | 3          | 7          |

*Note:* Variables are measured with seven-points Likert scales ranging from 'disagree strongly' to 'agree strongly' (coded from respectively 1 to 7).

**Table A2** Formal strategic planning logical incrementalism.

|                                                                                                                                     | <i>N</i> | <i>Mean</i> | <i>Min</i> | <i>Max</i> |
|-------------------------------------------------------------------------------------------------------------------------------------|----------|-------------|------------|------------|
| <b>Formal strategic planning</b>                                                                                                    |          |             |            |            |
| a) We developed our municipal strategic plan through a systematic planning process                                                  | 170      | 5.66        | 1          | 7          |
| c) Our municipal strategic plan was a formal strategic plan or an update of a formal strategic plan                                 | 167      | 5.10        | 1          | 7          |
| e) During plan development, we conducted situational analyses of our municipality's strengths and weaknesses                        | 170      | 5.43        | 2          | 7          |
| g) During plan development, we conducted situational analyses of our environment's opportunities and threats                        | 170      | 5.21        | 1          | 7          |
| i) During plan development, we established strategic goals and used them to drive decisions and actions throughout our municipality | 168      | 5.59        | 1          | 7          |

*Note:* Variables are measured with seven-points Likert scales ranging from 'disagree strongly' to 'agree strongly' (coded from respectively 1 to 7).

**Table A3** Logical incrementalism.

|                                                                                                                                                                     | <i>N</i> | <i>Mean</i> | <i>Min</i> | <i>Max</i> |
|---------------------------------------------------------------------------------------------------------------------------------------------------------------------|----------|-------------|------------|------------|
| <b>Logical incrementalism</b>                                                                                                                                       |          |             |            |            |
| b) Strategy has been made on an ongoing basis in our municipality                                                                                                   | 169      | 5.38        | 1          | 7          |
| d) Periodically, we have reassessed our own performance in light of changing circumstances and adjusted strategy accordingly                                        | 167      | 5.18        | 1          | 7          |
| f) We have tried to maintain flexibility for future options and made changes in strategy when suggested by newly emerging information                               | 167      | 5.40        | 2          | 7          |
| h) We have used forecasts of future conditions as the basis of our strategy but also have developed contingency plans to deal with uncertainties in those forecasts | 170      | 5.69        | 2          | 7          |

*Note:* Variables are measured with seven-points Likert scales ranging from 'disagree strongly' to 'agree strongly' (coded from respectively 1 to 7).

**Table A4** Involvement of stakeholders in strategic planning.

|                                                                                                                                                       | <i>N</i> | <i>Mean</i> | <i>Min</i> | <i>Max</i> |
|-------------------------------------------------------------------------------------------------------------------------------------------------------|----------|-------------|------------|------------|
| a) The mayor and aldermen have been centrally involved in the development of our municipal strategic plan.                                            | 171      | 5.03        | 1          | 7          |
| b) The municipal/city/district council has been centrally involved in the development of our municipal strategic plan.                                | 169      | 5.44        | 1          | 7          |
| c) The municipal/city/district manager (Chief Administrative Officer) has been centrally involved in the development of our municipal strategic plan. | 171      | 6.26        | 1          | 7          |
| d) The financial manager has been centrally involved in the development of our municipal strategic plan.                                              | 171      | 5.33        | 1          | 7          |
| e) Department heads and other senior managers have been centrally involved in the development of our municipal strategic plan.                        | 171      | 5.89        | 1          | 7          |
| f) Lower-level employees have been centrally involved in the development of our municipal strategic plan.                                             | 170      | 4.99        | 2          | 7          |
| g) Citizens have been centrally involved in the development of our municipal strategic plan.                                                          | 170      | 4.55        | 1          | 7          |
| h) Other external stakeholders have been centrally involved in the development of our municipal strategic plan.                                       | 170      | 4.60        | 1          | 7          |

*Note:* Variables are measured with seven-points Likert scales ranging from 'disagree strongly' to 'agree strongly' (coded from respectively 1 to 7).

**Table A5** Implementation of the strategic planning.

|                                                                                                                                                                                          | <i>N</i> | <i>Mean</i> | <i>Min</i> | <i>Max</i> |
|------------------------------------------------------------------------------------------------------------------------------------------------------------------------------------------|----------|-------------|------------|------------|
| <b>Linking budgeting to strategic planning</b>                                                                                                                                           |          |             |            |            |
| a) The annual budget strongly reflects the objectives and priorities established in the strategic plan                                                                                   | 167      | 5.68        | 2          | 7          |
| b) 'New money' in the budget is targeted to achieving the municipal strategic objectives                                                                                                 | 167      | 5.23        | 2          | 7          |
| c) The strategic plan has a strong influence on the budget requests submitted by department heads and other managers                                                                     | 167      | 5.06        | 2          | 7          |
| d) Information from performance measurements affects the resource allocation                                                                                                             | 167      | 4.35        | 1          | 7          |
| <b>Linking performance assessments to strategic planning</b>                                                                                                                             |          |             |            |            |
| a) Objectives established for department heads and other managers are derived from the overall strategic plan.                                                                           | 172      | 5.18        | 2          | 7          |
| b) Annual evaluations of department heads and managers are based largely on their accomplishment of strategic goals and objectives                                                       | 169      | 4.78        | 1          | 7          |
| c) The municipal council holds the chief administrative officer responsible for the implementation of the municipality's strategic plan                                                  | 171      | 5.56        | 1          | 7          |
| <b>9) Linking performance management to strategic planning</b>                                                                                                                           |          |             |            |            |
| a) We use performance measures to track the content of the strategic plan.                                                                                                               | 173      | 4.78        | 1          | 7          |
| b) The municipality reports performance associated with goals in the strategic plan to the municipal council on a regular basis.                                                         | 172      | 5.26        | 2          | 7          |
| c) The municipality targets some programmes/projects from the strategic plan for more extensive evaluation.                                                                              | 171      | 4.57        | 1          | 7          |
| d) The municipality reports performance associated with goals in the strategic plan to the inhabitants on a regular basis                                                                | 172      | 3.99        | 1          | 7          |
| e) We use performance measures for tracking the outcomes targeted by the strategic plan                                                                                                  | 169      | 4.45        | 1          | 7          |
| f) The municipality benchmarks performance measures against other municipalities to gauge the effectiveness of strategic actions (for example by participating in benchmarking networks) | 172      | 5.08        | 2          | 7          |
| g) The municipality tracks performances measures over time to determine whether the municipal performances improve                                                                       | 173      | 5.32        | 1          | 7          |

*Note:* Variables are measured with seven-points Likert scales ranging from 'disagree strongly' to 'agree strongly' (coded from respectively 1 to 7).
